# Supplementary figures and images for: Targeting bromodomain-containing protein 4 (BRD4) inhibits MYC expression in colorectal cancer cells
Source: PubMed Central journal article supplement — Neoplasia. 2019 Nov 14;21(11):1110–20. doi: 10.1016/j.neo.2019.10.003 (PMC6888720; doi:10.1016/j.neo.2019.10.003), 2019-11-14

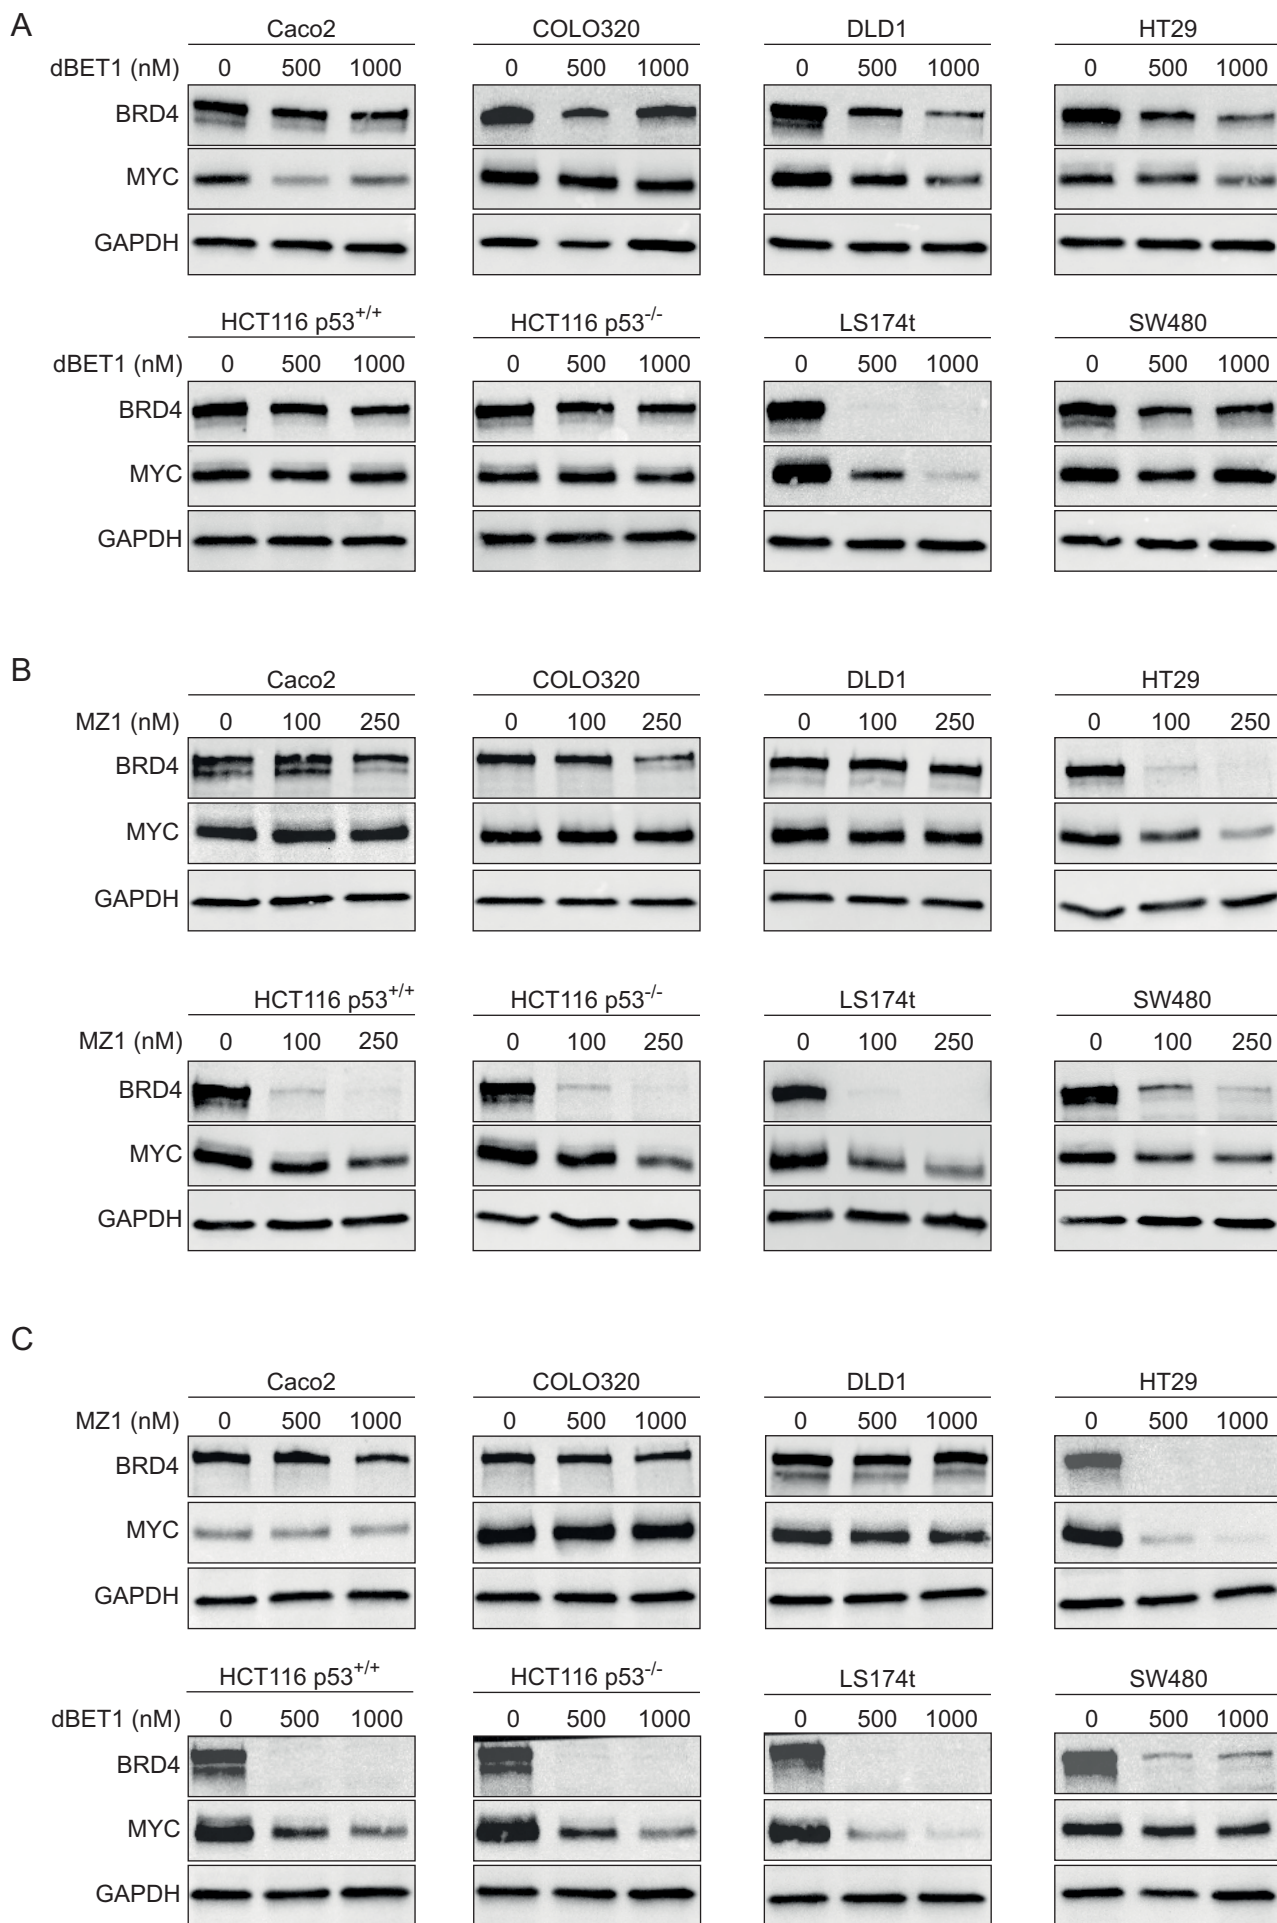

Supplement: mmc1.pdf [file mmc1.pdf]
